# Supplementary material for: Reversible near-infrared fluorescence switch by novel photochromic unsymmetrical-phthalocyanine hybrids based on bisthienyletheneElectronic supplementary information (ESI) available: experimental details, synthetic and spectroscopic data. See http://www.rsc.org/suppdata/cc/b2/b200718e/
Source: Royal Society of Chemistry journal article supplement (doi:10.1039/b200718e), 2002-04-15
Supplement: b200718e.pdf [file b200718e.pdf]

## Supplementary Information

**Reversible Near-Infrared Fluorescence Switch by Novel Photochromic  
Unsymmetrical-Phthalocyanines Hybrids based on Bisthienylethene**

Bingzhi Chen, Mingzhong Wang, Yingqi Wu, and He Tian\*

*Institute of Fine Chemicals, East China University of Science and Technology, Shanghai,*

*200237, P. R. China*

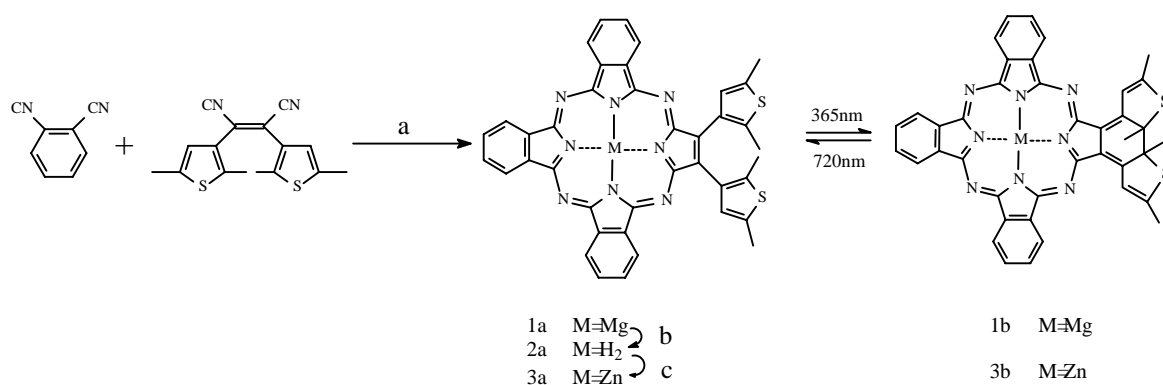

**Scheme 1** Synthetic routines and photochromism of the BTE-uPcs. Reaction conditions: a, Mg(OBu)<sub>2</sub>, n-BuOH, reflux, 24h; b, CH<sub>3</sub>COOH, 50°C, 10h; c, Zn(OAc)<sub>2</sub>, chlorobenzene/DMF, 100°C, 5h

A mixture of 1,2-dicyano-1,2-bis(2,5-dimethyl-3-thienyl)ethene (1.0 mmol) and much excessive 1,2-dicyanobenzene (100 mmol) were added to the Mg(OBu)<sub>2</sub> suspended in n-BuOH and the mixture was heated for 24h, turning dark blue/green. The solvent was evaporated out, and the residue was treated with CHCl<sub>3</sub>. This solution was filtered to remove insoluble phthalocyanine (MgPc) byproduct. The residue was then purified twice

\* Corresponding author: Fax: +86-21-64252288; E-mail: tianhe@ecust.edu.cn

by chromatography on silica gel using, at first  $\text{CHCl}_3$  and then 2% EtOH in  $\text{CHCl}_3$ , and the major blue band was collected to get crude  $\text{Mg}(\text{BTE-uPc})(1\text{a})$  (yield 8 %). The magnesium atom is clearly removed using acetic acid at  $50^\circ\text{C}$  for 10h to give  $\text{H}_2(\text{BTE-uPc})(2\text{a})$ , which was purified by chromatography on silica gel (hexane/ $\text{CH}_2\text{Cl}_2$ (v/v): 1:1 ). Reaction of 2a with  $\text{Zn}(\text{OAc})_2$  in chlorobenzene/DMF (v/v: 2/1) proceeds smoothly at  $100^\circ\text{C}$  for 5h to get  $\text{Zn}(\text{BTE-uPc})$  (3a). Structural data of **1a (Mg(BTE-uPc))**: UV-Vis ( $\text{CHCl}_3$ )  $\lambda_{\text{max}}/\text{nm}$  ( $\epsilon \times 10^{-5}/\text{M}^{-1}\text{cm}^{-1}$ ) : 678 (1.33), 653 (0.87), 448 (0.22), 353 (0.86). TOF-MS: calculated for  $\text{C}_{40}\text{H}_{26}\text{N}_8\text{S}_2\text{Mg}$ : 706.8 found: 707.1 ( $\text{M}^+$ ). Element analysis: calculated C 67.97; H 3.68; N 15.85; found C 67.80; H 3.66; N 15.80 %. Emission ( $\text{CHCl}_3$ ):  $\lambda_{\text{max}}/\text{nm}$  (excited at  $\lambda/\text{nm}$ ): 701(365), 703 (445). **2a (H<sub>2</sub>(BTE-uPc))**: UV-Vis( $\text{CHCl}_3$ )  $\lambda_{\text{max}}/\text{nm}$  ( $\epsilon \times 10^{-5}/\text{M}^{-1}\text{cm}^{-1}$ ): 703(1.24), 610(0.97), 564(0.24), 344(0.86). TOF-MS: calculated for  $\text{C}_{40}\text{H}_{28}\text{N}_8\text{S}_2$ : 684.5, found: 685.1 ( $\text{M}^+$ )  $^1\text{H}$  NMR ( $\text{CDCl}_3$ )( $\delta$  ppm): -0.86(s, 2H, =NH), 2.38(s, 6H, - $\text{CH}_3$ ), 2.70(s, 6H, - $\text{CH}_3$ ), 5.05(s, 2H, thienyl aromatic proton). 7.75-9.2(m, 12h, fused benzene proton). Element analysis: calculated C 70.19; H 4.09; N 16.36; found C 70.11; H 4.10; N 16.30 %. **3a (Zn(BTE-uPc))**: UV-Vis ( $\text{CHCl}_3$ )  $\lambda_{\text{max}}/\text{nm}$  ( $\epsilon \times 10^{-5}/\text{M}^{-1}\text{cm}^{-1}$ ): 678(1.20), 650(0.86), 597(0.23), 445(0.11), 353(0.56). TOF-MS: calculated for  $\text{C}_{40}\text{H}_{26}\text{N}_8\text{S}_2\text{Zn}$ : 747.9, found; 747.3( $\text{M}^+$ ),  $^1\text{H}$  NMR( $\text{CDCl}_3$ )( $\delta$  ppm): 2.27(s, 6H, - $\text{CH}_3$ ), 2.52(s, 6H, - $\text{CH}_3$ ), 5.12(s, 2H, thienyl aromatic proton). 7.50-9.00(m, 12h, fused benzene proton). Element analysis: calculated C 64.24; H 3.48; N 14.97; found C 64.20; H 3.46; N 14.90 %. Emission( $\text{CHCl}_3$ ):  $\lambda_{\text{max}}/\text{nm}$  (excited at  $\lambda/\text{nm}$ ): 701(365), 703(445).

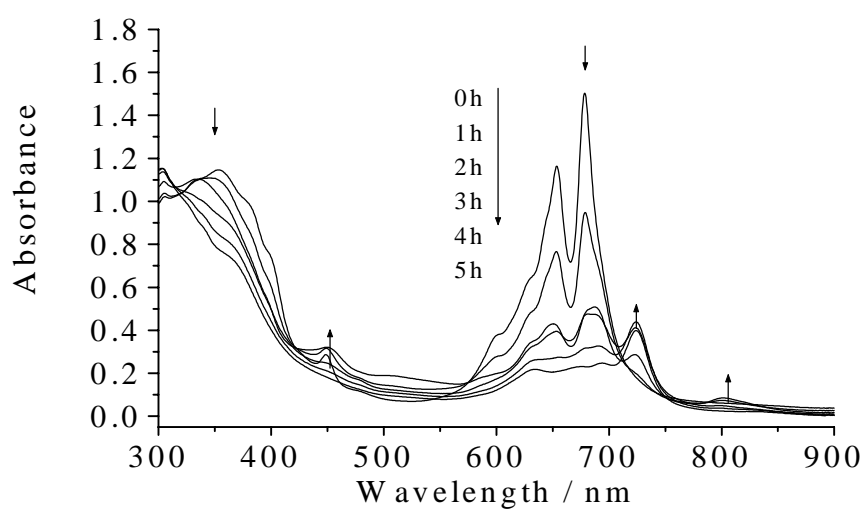

**Fig. 1** Absorption spectra of compound 1a in  $\text{CHCl}_3$  ( $1.3 \times 10^{-5} \text{ M}$ ) and the changes in absorption of 1a under different irradiation time by light of 365 nm.

Absorption

0.52 U

0.62 U WNG PPE

2a

0.61 U WNG PPE

0.52 U

0.10 U WNG PPE

0.06 U WNG PPE

0.00 U WNG PPE

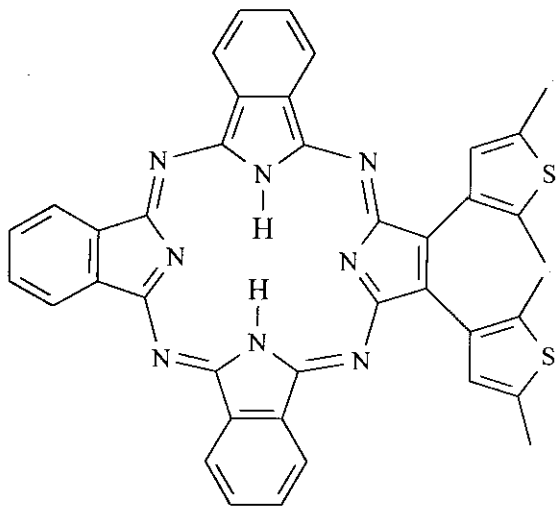

U

0.00 U

0.00 U

0.00 U
